Supplementary Material 1. An example of the 2012 annual bobcat hunter survey from the Wisconsin Department of Natural Resources. Annual surveys are available from:  
<https://dnr.wi.gov/topic/wildlifehabitat/reports.html>

Dear Bobcat Hunter/Trapper:

You have been selected to help the Department of Natural Resources gather much needed information on Wisconsin's bobcat harvest. Please help our furbearer management program by completing this voluntary questionnaire. We would like your input regarding bobcat season and management.

Using your stamp will save funds for management, even though no postage is required to return the questionnaire. Your time and effort is greatly appreciated. Thank you!

Sincerely,

*John F. Olson*

John F. Olson  
Furbearer Ecologist  
Bureau of Wildlife Management

| <p>1. Did you hunt and/or trap bobcat during the 2012-2013 season?<br/><br/>(1) <input type="checkbox"/> Yes      (2) <input type="checkbox"/> No</p>                                                                                                                                                                                                                                                                                                                                                                                                                                                                                                                                                                                                                                                                                                                                                                                                                                                                                                                                                                                                                                                                                                                                                                                                                                                                                                                                                                                                                                                                                                                                                                                                                                                                                                   | <p>2. If no, why didn't you hunt and/or trap for bobcat?<br/>(1) <input type="checkbox"/> Poor weather      (2) <input type="checkbox"/> Too far to travel<br/>(3) <input type="checkbox"/> Other (please explain): _____</p>                                                                                                                                                                                             |                 |           |                 |   |                 |  |                 |              |   |   |   |   |   |   |                                     |   |   |   |   |   |   |                           |   |   |   |   |   |   |                      |   |   |   |   |   |   |                              |   |   |   |   |   |   |                                                           |   |   |   |   |   |   |                               |   |   |   |   |   |   |                    |   |   |   |   |   |   |
|---------------------------------------------------------------------------------------------------------------------------------------------------------------------------------------------------------------------------------------------------------------------------------------------------------------------------------------------------------------------------------------------------------------------------------------------------------------------------------------------------------------------------------------------------------------------------------------------------------------------------------------------------------------------------------------------------------------------------------------------------------------------------------------------------------------------------------------------------------------------------------------------------------------------------------------------------------------------------------------------------------------------------------------------------------------------------------------------------------------------------------------------------------------------------------------------------------------------------------------------------------------------------------------------------------------------------------------------------------------------------------------------------------------------------------------------------------------------------------------------------------------------------------------------------------------------------------------------------------------------------------------------------------------------------------------------------------------------------------------------------------------------------------------------------------------------------------------------------------|---------------------------------------------------------------------------------------------------------------------------------------------------------------------------------------------------------------------------------------------------------------------------------------------------------------------------------------------------------------------------------------------------------------------------|-----------------|-----------|-----------------|---|-----------------|--|-----------------|--------------|---|---|---|---|---|---|-------------------------------------|---|---|---|---|---|---|---------------------------|---|---|---|---|---|---|----------------------|---|---|---|---|---|---|------------------------------|---|---|---|---|---|---|-----------------------------------------------------------|---|---|---|---|---|---|-------------------------------|---|---|---|---|---|---|--------------------|---|---|---|---|---|---|
| <p>3. Knowing it may require five years or more of continuous application, will you continue to apply for a bobcat permit in the future?<br/>(1) <input type="checkbox"/> Yes      (2) <input type="checkbox"/> No</p>                                                                                                                                                                                                                                                                                                                                                                                                                                                                                                                                                                                                                                                                                                                                                                                                                                                                                                                                                                                                                                                                                                                                                                                                                                                                                                                                                                                                                                                                                                                                                                                                                                  | <p>4. Overall, what was your impression of the "split" bobcat season?<br/>No Opinion      Did Not Like It      Did Like It<br/>0      1      2      3      4      5      6      7</p>                                                                                                                                                                                                                                     |                 |           |                 |   |                 |  |                 |              |   |   |   |   |   |   |                                     |   |   |   |   |   |   |                           |   |   |   |   |   |   |                      |   |   |   |   |   |   |                              |   |   |   |   |   |   |                                                           |   |   |   |   |   |   |                               |   |   |   |   |   |   |                    |   |   |   |   |   |   |
| <p><b>IF YOU DID NOT HUNT OR TRAP, STOP HERE AND RETURN THIS QUESTIONNAIRE. THANK YOU!</b></p>                                                                                                                                                                                                                                                                                                                                                                                                                                                                                                                                                                                                                                                                                                                                                                                                                                                                                                                                                                                                                                                                                                                                                                                                                                                                                                                                                                                                                                                                                                                                                                                                                                                                                                                                                          |                                                                                                                                                                                                                                                                                                                                                                                                                           |                 |           |                 |   |                 |  |                 |              |   |   |   |   |   |   |                                     |   |   |   |   |   |   |                           |   |   |   |   |   |   |                      |   |   |   |   |   |   |                              |   |   |   |   |   |   |                                                           |   |   |   |   |   |   |                               |   |   |   |   |   |   |                    |   |   |   |   |   |   |
| <p>5. What primary harvest technique did you use?<br/>(1) <input type="checkbox"/> Trapping      (2) <input type="checkbox"/> Predator Calls      (3) <input type="checkbox"/> Hunting Dogs</p>                                                                                                                                                                                                                                                                                                                                                                                                                                                                                                                                                                                                                                                                                                                                                                                                                                                                                                                                                                                                                                                                                                                                                                                                                                                                                                                                                                                                                                                                                                                                                                                                                                                         |                                                                                                                                                                                                                                                                                                                                                                                                                           |                 |           |                 |   |                 |  |                 |              |   |   |   |   |   |   |                                     |   |   |   |   |   |   |                           |   |   |   |   |   |   |                      |   |   |   |   |   |   |                              |   |   |   |   |   |   |                                                           |   |   |   |   |   |   |                               |   |   |   |   |   |   |                    |   |   |   |   |   |   |
| <p>6. Did you register a bobcat during the 2012-2013 season (October 20 - December 25 or December 26 - January 31) ?<br/>(1) <input type="checkbox"/> Yes      (2) <input type="checkbox"/> No</p>                                                                                                                                                                                                                                                                                                                                                                                                                                                                                                                                                                                                                                                                                                                                                                                                                                                                                                                                                                                                                                                                                                                                                                                                                                                                                                                                                                                                                                                                                                                                                                                                                                                      | <p>6a. If yes, what was its' final disposition?<br/>(1) <input type="checkbox"/> Sold for the fur trade      (3) <input type="checkbox"/> Tanned and kept or sold<br/>(2) <input type="checkbox"/> Made into a taxidermy mount</p>                                                                                                                                                                                        |                 |           |                 |   |                 |  |                 |              |   |   |   |   |   |   |                                     |   |   |   |   |   |   |                           |   |   |   |   |   |   |                      |   |   |   |   |   |   |                              |   |   |   |   |   |   |                                                           |   |   |   |   |   |   |                               |   |   |   |   |   |   |                    |   |   |   |   |   |   |
| <p>7. How would you rate the hunting/trapping conditions during <b>your</b> bobcat season?<br/><br/> <div style="display: flex; justify-content: space-around; width: 100%;"> <span>1</span><span>2</span><span>3</span><span>4</span><span>5</span><span>6</span><span>7</span> </div> <div style="display: flex; justify-content: space-around; width: 100%; font-size: small;"> <span>Very Poor</span><span>Average</span><span>Perfect</span> </div> <p>Please rate the following factors and how they may have influenced your bobcat hunting/trapping:</p> <table style="width:100%; border-collapse: collapse; font-size: x-small;"> <thead> <tr> <th style="width: 50%;"></th> <th style="width: 10%;">No Impact</th> <th style="width: 10%;">Negative Impact</th> <th style="width: 10%;"></th> <th style="width: 10%;"></th> <th style="width: 10%;"></th> <th style="width: 10%;">Positive Impact</th> </tr> </thead> <tbody> <tr><td>Cold Weather</td><td>0</td><td>1</td><td>2</td><td>3</td><td>4</td><td>5</td></tr> <tr><td>Presence of tracking snow (1" - 2")</td><td>0</td><td>1</td><td>2</td><td>3</td><td>4</td><td>5</td></tr> <tr><td>Walking snow (2"+ to 12")</td><td>0</td><td>1</td><td>2</td><td>3</td><td>4</td><td>5</td></tr> <tr><td>Snowshoe snow (12"+)</td><td>0</td><td>1</td><td>2</td><td>3</td><td>4</td><td>5</td></tr> <tr><td>Impassable roads (snowed in)</td><td>0</td><td>1</td><td>2</td><td>3</td><td>4</td><td>5</td></tr> <tr><td>Split Season decreased the number of permits in the field</td><td>0</td><td>1</td><td>2</td><td>3</td><td>4</td><td>5</td></tr> <tr><td>Other bobcat hunters/trappers</td><td>0</td><td>1</td><td>2</td><td>3</td><td>4</td><td>5</td></tr> <tr><td>Other forest users</td><td>0</td><td>1</td><td>2</td><td>3</td><td>4</td><td>5</td></tr> </tbody> </table> </p> |                                                                                                                                                                                                                                                                                                                                                                                                                           |                 | No Impact | Negative Impact |   |                 |  | Positive Impact | Cold Weather | 0 | 1 | 2 | 3 | 4 | 5 | Presence of tracking snow (1" - 2") | 0 | 1 | 2 | 3 | 4 | 5 | Walking snow (2"+ to 12") | 0 | 1 | 2 | 3 | 4 | 5 | Snowshoe snow (12"+) | 0 | 1 | 2 | 3 | 4 | 5 | Impassable roads (snowed in) | 0 | 1 | 2 | 3 | 4 | 5 | Split Season decreased the number of permits in the field | 0 | 1 | 2 | 3 | 4 | 5 | Other bobcat hunters/trappers | 0 | 1 | 2 | 3 | 4 | 5 | Other forest users | 0 | 1 | 2 | 3 | 4 | 5 |
|                                                                                                                                                                                                                                                                                                                                                                                                                                                                                                                                                                                                                                                                                                                                                                                                                                                                                                                                                                                                                                                                                                                                                                                                                                                                                                                                                                                                                                                                                                                                                                                                                                                                                                                                                                                                                                                         | No Impact                                                                                                                                                                                                                                                                                                                                                                                                                 | Negative Impact |           |                 |   | Positive Impact |  |                 |              |   |   |   |   |   |   |                                     |   |   |   |   |   |   |                           |   |   |   |   |   |   |                      |   |   |   |   |   |   |                              |   |   |   |   |   |   |                                                           |   |   |   |   |   |   |                               |   |   |   |   |   |   |                    |   |   |   |   |   |   |
| Cold Weather                                                                                                                                                                                                                                                                                                                                                                                                                                                                                                                                                                                                                                                                                                                                                                                                                                                                                                                                                                                                                                                                                                                                                                                                                                                                                                                                                                                                                                                                                                                                                                                                                                                                                                                                                                                                                                            | 0                                                                                                                                                                                                                                                                                                                                                                                                                         | 1               | 2         | 3               | 4 | 5               |  |                 |              |   |   |   |   |   |   |                                     |   |   |   |   |   |   |                           |   |   |   |   |   |   |                      |   |   |   |   |   |   |                              |   |   |   |   |   |   |                                                           |   |   |   |   |   |   |                               |   |   |   |   |   |   |                    |   |   |   |   |   |   |
| Presence of tracking snow (1" - 2")                                                                                                                                                                                                                                                                                                                                                                                                                                                                                                                                                                                                                                                                                                                                                                                                                                                                                                                                                                                                                                                                                                                                                                                                                                                                                                                                                                                                                                                                                                                                                                                                                                                                                                                                                                                                                     | 0                                                                                                                                                                                                                                                                                                                                                                                                                         | 1               | 2         | 3               | 4 | 5               |  |                 |              |   |   |   |   |   |   |                                     |   |   |   |   |   |   |                           |   |   |   |   |   |   |                      |   |   |   |   |   |   |                              |   |   |   |   |   |   |                                                           |   |   |   |   |   |   |                               |   |   |   |   |   |   |                    |   |   |   |   |   |   |
| Walking snow (2"+ to 12")                                                                                                                                                                                                                                                                                                                                                                                                                                                                                                                                                                                                                                                                                                                                                                                                                                                                                                                                                                                                                                                                                                                                                                                                                                                                                                                                                                                                                                                                                                                                                                                                                                                                                                                                                                                                                               | 0                                                                                                                                                                                                                                                                                                                                                                                                                         | 1               | 2         | 3               | 4 | 5               |  |                 |              |   |   |   |   |   |   |                                     |   |   |   |   |   |   |                           |   |   |   |   |   |   |                      |   |   |   |   |   |   |                              |   |   |   |   |   |   |                                                           |   |   |   |   |   |   |                               |   |   |   |   |   |   |                    |   |   |   |   |   |   |
| Snowshoe snow (12"+)                                                                                                                                                                                                                                                                                                                                                                                                                                                                                                                                                                                                                                                                                                                                                                                                                                                                                                                                                                                                                                                                                                                                                                                                                                                                                                                                                                                                                                                                                                                                                                                                                                                                                                                                                                                                                                    | 0                                                                                                                                                                                                                                                                                                                                                                                                                         | 1               | 2         | 3               | 4 | 5               |  |                 |              |   |   |   |   |   |   |                                     |   |   |   |   |   |   |                           |   |   |   |   |   |   |                      |   |   |   |   |   |   |                              |   |   |   |   |   |   |                                                           |   |   |   |   |   |   |                               |   |   |   |   |   |   |                    |   |   |   |   |   |   |
| Impassable roads (snowed in)                                                                                                                                                                                                                                                                                                                                                                                                                                                                                                                                                                                                                                                                                                                                                                                                                                                                                                                                                                                                                                                                                                                                                                                                                                                                                                                                                                                                                                                                                                                                                                                                                                                                                                                                                                                                                            | 0                                                                                                                                                                                                                                                                                                                                                                                                                         | 1               | 2         | 3               | 4 | 5               |  |                 |              |   |   |   |   |   |   |                                     |   |   |   |   |   |   |                           |   |   |   |   |   |   |                      |   |   |   |   |   |   |                              |   |   |   |   |   |   |                                                           |   |   |   |   |   |   |                               |   |   |   |   |   |   |                    |   |   |   |   |   |   |
| Split Season decreased the number of permits in the field                                                                                                                                                                                                                                                                                                                                                                                                                                                                                                                                                                                                                                                                                                                                                                                                                                                                                                                                                                                                                                                                                                                                                                                                                                                                                                                                                                                                                                                                                                                                                                                                                                                                                                                                                                                               | 0                                                                                                                                                                                                                                                                                                                                                                                                                         | 1               | 2         | 3               | 4 | 5               |  |                 |              |   |   |   |   |   |   |                                     |   |   |   |   |   |   |                           |   |   |   |   |   |   |                      |   |   |   |   |   |   |                              |   |   |   |   |   |   |                                                           |   |   |   |   |   |   |                               |   |   |   |   |   |   |                    |   |   |   |   |   |   |
| Other bobcat hunters/trappers                                                                                                                                                                                                                                                                                                                                                                                                                                                                                                                                                                                                                                                                                                                                                                                                                                                                                                                                                                                                                                                                                                                                                                                                                                                                                                                                                                                                                                                                                                                                                                                                                                                                                                                                                                                                                           | 0                                                                                                                                                                                                                                                                                                                                                                                                                         | 1               | 2         | 3               | 4 | 5               |  |                 |              |   |   |   |   |   |   |                                     |   |   |   |   |   |   |                           |   |   |   |   |   |   |                      |   |   |   |   |   |   |                              |   |   |   |   |   |   |                                                           |   |   |   |   |   |   |                               |   |   |   |   |   |   |                    |   |   |   |   |   |   |
| Other forest users                                                                                                                                                                                                                                                                                                                                                                                                                                                                                                                                                                                                                                                                                                                                                                                                                                                                                                                                                                                                                                                                                                                                                                                                                                                                                                                                                                                                                                                                                                                                                                                                                                                                                                                                                                                                                                      | 0                                                                                                                                                                                                                                                                                                                                                                                                                         | 1               | 2         | 3               | 4 | 5               |  |                 |              |   |   |   |   |   |   |                                     |   |   |   |   |   |   |                           |   |   |   |   |   |   |                      |   |   |   |   |   |   |                              |   |   |   |   |   |   |                                                           |   |   |   |   |   |   |                               |   |   |   |   |   |   |                    |   |   |   |   |   |   |
| <p>8. If you <b>TRAPPED</b> bobcat during the 2012-2013 season, please answer the following questions:<br/><br/>                 Number of days trapped _____<br/>                 Average number of sets/day _____<br/>                 Number of bobcats located _____</p>                                                                                                                                                                                                                                                                                                                                                                                                                                                                                                                                                                                                                                                                                                                                                                                                                                                                                                                                                                                                                                                                                                                                                                                                                                                                                                                                                                                                                                                                                                                                                                            | <p>9. Type of sets used:<br/><br/>                 _____ # of foothold sets made<br/>                 _____ # of body-gripper sets<br/>                 _____ # of cage sets<br/>                 _____ # of cable restraint sets made</p>                                                                                                                                                                                |                 |           |                 |   |                 |  |                 |              |   |   |   |   |   |   |                                     |   |   |   |   |   |   |                           |   |   |   |   |   |   |                      |   |   |   |   |   |   |                              |   |   |   |   |   |   |                                                           |   |   |   |   |   |   |                               |   |   |   |   |   |   |                    |   |   |   |   |   |   |
| <p>10. Did you release any bobcats from your traps during the 2012-2013 season?<br/>(1) <input type="checkbox"/> Yes      (2) <input type="checkbox"/> No<br/><br/>                 If yes, how many? _____</p>                                                                                                                                                                                                                                                                                                                                                                                                                                                                                                                                                                                                                                                                                                                                                                                                                                                                                                                                                                                                                                                                                                                                                                                                                                                                                                                                                                                                                                                                                                                                                                                                                                         | <p>11. If you <b>HUNTED</b> bobcat during the 2012-2013 season, please answer the following questions:<br/>                 Number of days hunted with dogs _____<br/>                 Number of days hunted without dogs _____<br/>                 Number of bobcats run with dogs _____<br/>                 Number of bobcats located _____<br/>                 Number of days hunted using predator calls _____</p> |                 |           |                 |   |                 |  |                 |              |   |   |   |   |   |   |                                     |   |   |   |   |   |   |                           |   |   |   |   |   |   |                      |   |   |   |   |   |   |                              |   |   |   |   |   |   |                                                           |   |   |   |   |   |   |                               |   |   |   |   |   |   |                    |   |   |   |   |   |   |

**Figure 1.** The 2012-2013 Wisconsin bobcat hunting/trapping questionnaire.

12. Did you pass on any treed bobcats during the 2012-2013 season?

(1)  Yes (2)  No If yes, how many? \_\_\_\_\_

13. In your bobcat hunting/trapping efforts, did you:  
(Check all that apply)

(1)  Hunt/trap alone  
(2)  Hunt/trap with friend(s)  
(3)  Participate in a guided trip (go to 13a)

13a. If you participated in a guided trip, generally what was the fee?

(1)  less than \$500  
(2)  \$500 to \$999  
(3)  \$1,000 to \$1,499  
(2)  \$1,500 to \$1,999  
(3)  \$2,000+

14. In which counties did you hunt and/or trap bobcats? (Please list the county you spent the most time in first.)

\_\_\_\_\_

\_\_\_\_\_

15. Have you observed bobcats SOUTH of the current hunting zone (current zone is all of WI north of Hwy 64)?

(1)  Yes (2)  No

15a. If yes, please fill in the following information:

| # of Road Kill | County | # of Live Sitings | County |
|----------------|--------|-------------------|--------|
|                |        |                   |        |
|                |        |                   |        |
|                |        |                   |        |

16. In your opinion, how does the current bobcat, fox, coyote, fisher, and gray wolf population compare to last year?  
(Check one for each species)

|                              | <u>Bobcat</u>            | <u>Fox</u>               | <u>Coyote</u>            | <u>Fisher</u>            | <u>Gray Wolf</u>         |
|------------------------------|--------------------------|--------------------------|--------------------------|--------------------------|--------------------------|
| More abundant than last year | <input type="checkbox"/> | <input type="checkbox"/> | <input type="checkbox"/> | <input type="checkbox"/> | <input type="checkbox"/> |
| Less abundant than last year | <input type="checkbox"/> | <input type="checkbox"/> | <input type="checkbox"/> | <input type="checkbox"/> | <input type="checkbox"/> |
| About the same as last year  | <input type="checkbox"/> | <input type="checkbox"/> | <input type="checkbox"/> | <input type="checkbox"/> | <input type="checkbox"/> |
| No opinion                   | <input type="checkbox"/> | <input type="checkbox"/> | <input type="checkbox"/> | <input type="checkbox"/> | <input type="checkbox"/> |

16a. In your opinion, how does the current population of these same furbearers compare to ten years ago? (Check one for each species)

|                                  | <u>Bobcat</u>            | <u>Fox</u>               | <u>Coyote</u>            | <u>Fisher</u>            | <u>Gray Wolf</u>         |
|----------------------------------|--------------------------|--------------------------|--------------------------|--------------------------|--------------------------|
| More abundant than ten years ago | <input type="checkbox"/> | <input type="checkbox"/> | <input type="checkbox"/> | <input type="checkbox"/> | <input type="checkbox"/> |
| Less abundant than ten years ago | <input type="checkbox"/> | <input type="checkbox"/> | <input type="checkbox"/> | <input type="checkbox"/> | <input type="checkbox"/> |
| About the same as ten years ago  | <input type="checkbox"/> | <input type="checkbox"/> | <input type="checkbox"/> | <input type="checkbox"/> | <input type="checkbox"/> |
| No opinion                       | <input type="checkbox"/> | <input type="checkbox"/> | <input type="checkbox"/> | <input type="checkbox"/> | <input type="checkbox"/> |

17. In which habitat type did you hunt and/or trap for bobcat the most? (Check one)

| <u>Upland Conifers</u>                            | <u>Upland Hardwoods</u>                           | <u>Lowland Forest / Swamp</u>                     |
|---------------------------------------------------|---------------------------------------------------|---------------------------------------------------|
| (1) <input type="checkbox"/> Regeneration / Brush | (1) <input type="checkbox"/> Regeneration / Brush | (1) <input type="checkbox"/> Regeneration / Brush |
| (2) <input type="checkbox"/> Thinned / Pole-sized | (2) <input type="checkbox"/> Thinned / Pole-sized | (2) <input type="checkbox"/> Thinned / Pole-sized |
| (3) <input type="checkbox"/> Large / Mature       | (3) <input type="checkbox"/> Large / Mature       | (3) <input type="checkbox"/> Large / Mature       |

18. Did you experience any competition or over-crowding with other bobcat hunters?

(1)  Yes (2)  No

If yes, what county or counties did you experience competition or over-crowding with other bobcat hunters?

\_\_\_\_\_

\_\_\_\_\_

19. Did you experience any competition or over-crowding with other bobcat trappers?

(1)  Yes (2)  No

If yes, what county or counties did you experience competition or over-crowding with other bobcat trappers?

\_\_\_\_\_

\_\_\_\_\_

20. Did you experience any competition or over-crowding with the outdoor activities of others?

(1)  Yes (2)  No If yes, what county or counties did you experience competition or over-crowding?

\_\_\_\_\_

\_\_\_\_\_

\_\_\_\_\_

Please add any comments you would like to offer regarding bobcat populations, harvest regulations or overall bobcat management.

Figure 1. Continued.
